# Supplementary material for: α-Xylosidase plays essential roles in xyloglucan remodelling, maintenance of cell wall integrity, and seed germination in Arabidopsis thaliana
Source: PubMed Central journal article supplement (PMC5066485; doi:10.1093/jxb/erw321), 2016-09-07
Supplement: supp_erw321_Supplementary_Tables_S1_S5.pdf [file supp_erw321_Supplementary_Tables_S1_S5.pdf]

**Supplementary Table S1.** Molecular markers used for *trgI* mapping

| Marker name | Primer Sequence (mer)                                            | Chr. | Marker type | Position (bp)            | Annealing temp. (°C) | Restriction enzyme | Estimated size on a gel (bp) |              | Agarose conc. (%) |
|-------------|------------------------------------------------------------------|------|-------------|--------------------------|----------------------|--------------------|------------------------------|--------------|-------------------|
|             |                                                                  |      |             |                          |                      |                    | Ws                           | Col+         |                   |
| nga63       | AACCAAGGCACAGAAGCG (18)<br>ACCCAAGTGATCGCCACC (18)               | 1    | SSLP        | 3,244,463<br>3,244,573   | 55                   |                    | 92                           | 118          | 5                 |
| nga248      | TCTGTATCTCGGTGAATTCTCC (22)<br>TACCGAACCAAAACACAAAGG (21)        | 1    | SSLP        | 9,887,359<br>9,887,503   | 55                   |                    | 92                           | 109          | 5                 |
| nga280      | CTGATCTCACGGACAATAGTGC (22)<br>GGCTCCATAAAAAGTGCACC (20)         | 1    | SSLP        | 20,877,364<br>20,877,467 | 55                   |                    | 92                           | 109          | 5                 |
| F5I14-49495 | CTGCCTGAAATTGTCGAAAC (20)<br>GGCATCACAGTTCTGATTCC (20)           | 1    | SSLP        | 24,374,008<br>24,374,203 | 55                   |                    | 295                          | 200          | 3                 |
| 14G4        | CGTCACCGTTGCCACTTCCGCC (22)<br>CACATATATGGCCACAACCTCTCTGTAG (27) | 1    | CAPS        | 25,567,517<br>25,567,942 | 65                   | <i>ScrFI</i>       | 465                          | 340, 105     | 2                 |
| TJ-5        | CTTCTCGCCATAGCTTCA (18)<br>CAGATCCGTCAATAACAG (18)               | 1    | INDEL       | 25,697,281<br>25,697,452 | 53                   |                    | 190                          | 176          | 4                 |
| FJ-4        | TCCGACCAACCGTTTCT (18)<br>AAGCCTTACACGCTAACA (18)                | 1    | CAPS        | 25,755,578<br>25,754,557 | 55                   | <i>BamHI</i>       | 405, 350, 210                | 565, 405     | 2                 |
| FN-1        | ATAATTCTGTCTGTTGG (18)<br>AAGTGACGAAGATTAACA (18)                | 1    | INDEL       | 25,982,118<br>25,982,885 | 45                   |                    | 1,100                        | 810          | 1                 |
| KNAT2       | GGTAGCCATATCAGTTCATTG (21)<br>ATTTAGTTGACACATCAGCTATC (23)       | 1    | CAPS        | 26,585,436<br>26,586,066 | 55                   | <i>AluI</i>        | 216, 175, 194, 62            | 410, 170, 62 | 4                 |
| nga111      | TGTTTTTTAGGACAAATGGCG (21)<br>CTCCAGTTGGAAGCTAAAGGG (21)         | 1    | SSLP        | 27,356,874<br>27,357,002 | 55                   |                    | 142                          | 124          | 4                 |
| m246        | GCTTGAACTCCTCCTCCTTC (20)<br>TGAAGAGCTATCCGAGATGG (20)           | 2    | CAPS        | 1,130,867<br>1,132,341   | 55                   | <i>MaeIII</i>      | 1122, 232                    | 1450         | 0.8               |
| nga168      | TCGTCTACTGCACTGCCG (18)<br>GAGGACATGTATAGGAGCCTCG (22)           | 2    | SSLP        | 16,298,919<br>16,299,069 | 55                   |                    | 140                          | 157          | 5                 |
| nga162      | CATGCAATTTGCATCTGAGG (20)<br>CTCTGTCACTCTTTTCTCTGG (22)          | 3    | SSLP        | 4,608,284<br>4,608,390   | 55                   |                    | 88                           | 107          | 5                 |
| nga6        | TGGATTTCTTCTCTTTCAC (21)<br>ATGGAGAAGCTTACACTGATC (21)           | 3    | SSLP        | 23,042,025<br>23,042,167 | 55                   |                    | 160                          | 146          | 5                 |
| nga8        | GAGGGCAAATCTTTATTTCCG (21)<br>TGGCTTTCGTTTATAAACATCC (22)        | 4    | SSLP        | 5,628,810<br>5,628,966   | 55                   |                    | 165                          | 150          | 5                 |
| nga1107     | GCGAAAAACAAAAAATCCA (21)<br>CGACGAATCGACAGAATTAGG (21)           | 4    | SSLP        | 18,096,131<br>18,096,282 | 55                   |                    | 139                          | 148          | 5                 |
| nga151      | GTTTTGGGAAGTTTTGCTGG (20)<br>CAGTCTAAAAGCGAGAGTATGATG (24)       | 5    | SSLP        | 4,669,932<br>4,670,081   | 55                   |                    | 102                          | 146          | 5                 |
| nga76       | GGAGAAAATGTCCTCTCCACC (22)<br>AGGCATGGGAGACATTTACG (20)          | 5    | SSLP        | 10,418,614<br>10,418,844 | 55                   |                    | 198                          | 234          | 5                 |

**Supplementary Table S2.** Primers used for *TRG1/XYL1* (At1g68560) and *trg1-1* mutant allele cloning by PCR

| Clone Name          | Forward primer                   | Reverse primer          | Appendix                                              |
|---------------------|----------------------------------|-------------------------|-------------------------------------------------------|
| <i>TRG1/trg1</i>    | ACAATACACTTGCCTATTAGTGTT         | TCATATCCTGAGACTGCCTACCC | For identification of the mutation                    |
| <i>TRG1pro:TRG1</i> | <u>CACCGATTCGTCGGCTACGTGGTAT</u> | TGGATCTTCTGGGCTGGACTT   | For complementation analysis, transform <i>trg1-1</i> |
| <i>TRG1pro:GUS</i>  | <u>CACCGATTCGTCGGCTACGTGGTAT</u> | CATGGCTATAGAGTGGTACTTIA | For gene expression analysis, transform Ws            |

CACC sequence underlined is attached to the 5' end of gene specific sequence for cloning with pENTR Directional TOPO vector of Invitrogen.

**Supplementary Table S3.** Primers used for *TRG1/XYL1* and *trg1-1* sequencing

| Primer name | Sequence                  |
|-------------|---------------------------|
| U-59        | CATTGTCTGGTTTTCTGGCTTGGG  |
| U493        | TGCTCAATGCAAACCTTACCTTC   |
| U1061       | CATACCAAGAGCGTTACGAGCTGA  |
| U1603       | CAGGACCTTCCCCACTTGGACAC   |
| U2211       | CAAGAACCGTGGTCCATGTCT     |
| U2739       | ACATACCTAAAGACCAGTACGGCA  |
| U3304       | GACTTGTGGTGGTTGTTCTCGTGGG |
| U3713       | CCATGGCTATAGAGTGGTACTT    |

**Supplementary Table S4.** Primers for gene expression analysis with qRT-PCR

| AGI code                        | Gene name        | Sequence                                                | Reference               |
|---------------------------------|------------------|---------------------------------------------------------|-------------------------|
| Reference genes                 |                  |                                                         |                         |
| At2g20000                       | <i>HBT</i>       | GTATAGCTCCACCACCACTT<br>TCTTCTAGGTGCTTGAAGAGT           | Graeber et al., 2011    |
| At2g28390                       | SAND family      | AACTCTATGCAGCATTGATCCACT<br>TGATTGCATATCTTTATCGCCATC    | Czechowski et al., 2005 |
| At4g34270                       | TIP41-like       | GTGAAAACCTGTTGGAGAGAAGCAA<br>TCAACTGGATAACCCTTTTCGCA    | Czechowski et al., 2005 |
| At5g15710                       | F-box protein    | TTTCGGCTGAGAGGTTTCGAGT<br>GATTCCAAGACGTAAAGCAGATCAA     | Czechowski et al., 2005 |
| At2g01010, At3g41768            | <i>18S rRNA</i>  | CAGATACCGTCCTAGTCTCAACCA<br>CAGCGGAGTCCTATAAGCAACAT     |                         |
| ABA biosynthesis and catabolism |                  |                                                         |                         |
| At5g67030                       | <i>ABA1/ZEP</i>  | TTGTTTGGCCGTAGTGAAGCT<br>AGACTCGATATCCGCTGGTATAAAA      |                         |
| At4g18350                       | <i>NCED2</i>     | GCGGCTGAGCGTGCATTAA<br>GGGAATAATTCCCGGCAATCT            |                         |
| At1g30100                       | <i>NCED5</i>     | CCTCCGTTAGTTTCACCAACACT<br>GGTGTGTCGGAGACGGAGTT         |                         |
| At1g78390                       | <i>NCED9</i>     | GGAAAACGCCATGATCTCACA<br>AGGATCCGCCGTTTTAGGAT           |                         |
| At4g19230                       | <i>CYP707A1</i>  | CTCACTCTCTCGCCGGAAG<br>GGAGGGAGTGGGAGTTTGGAA            |                         |
| At2g29090                       | <i>CYP707A2</i>  | CGTCTCTCACATCGAGCTCCTT<br>GAGGGTGTGATGGACTTTTGG         |                         |
| At5g45340                       | <i>CYP707A3</i>  | CTCTGTTTCTCTGTTTACTCCCGATTTA<br>CGTATCTTCTCTGTTTTGCTGCA |                         |
| GA biosynthesis                 |                  |                                                         |                         |
| AT1G15550                       | <i>GA3ox1</i>    | GGACAAACCGGGTAGTGATTT<br>ATGGGCCAGTCTCAGTTCAG           |                         |
| At1g80340                       | <i>GA3ox2</i>    | GTTTCCAAGTGAGAGATGGGTAG<br>TCTCCACTTCCCAAACCTGGT        |                         |
| $\alpha$ -xylosidase            |                  |                                                         |                         |
| AT1G68560                       | <i>TRG1/XYL1</i> | TTAGCCTCGTCATTGCTTTCC<br>TCCCGGTGGCGTAACCT              |                         |

**Supplementary Table S5.** Primers used for the confirmation of clone sequence for complementation and tissue specific gene expression analyses

| Clone Name          | Primer Name        | Sequence                    |
|---------------------|--------------------|-----------------------------|
| <i>TRG1pro:TRG1</i> | 68560-L1351        | CAGCTATCAATCTTAACACTGACC    |
|                     | 68560-L-184        | GGTCATCGCATTAAATTCTCAAACAAC |
|                     | 68560-L1907        | GAGTATCTGATTTTCCGACACAAC    |
|                     | 68560-L2574        | GTCCGGTTTACTTCCCTGATTT      |
|                     | 68560-L3097        | GAACTTCGGTATATTTGGAGTTCC    |
|                     | 68560-L3609        | CCAAAACACTATCTTACCAACGCA    |
|                     | 68560-L556         | CCATAAGCTAAAGAGGGTTCCGGTT   |
|                     | 68560-L-613        | CGAGATGTTACATGCATGTATG      |
|                     | 68560-L825         | CTACGGCTCTGATATCACCCT       |
|                     | 68560-U1061        | CATACCAAGAGCGTTACGAGCTGA    |
|                     | 68560-U1603        | CAGGACCTTCCCCACTTGGACAC     |
|                     | 68560-U2211        | CAAGAACCGTGGTCCATGTCT       |
|                     | 68560-U2739        | ACATACCTAAAGACCAGTACGGCA    |
|                     | 68560-U4265        | GTATTGTAGTGATCTATCATCTATC   |
|                     | 68560-U4794        | AATATATACTCCGTGTCCGTGAC     |
|                     | 68560-U493         | TGCTCAATGCAAACCTTACCTC      |
|                     | 68560-U5326ws      | AACAGTATAAATTTTAAACGGTACAC  |
|                     | 68560-U-551        | ACCGGTTTGTCTTCCTAGAGT       |
|                     | 68560-U-775        | ATGCATTCCTCACCTGGCTTC       |
|                     | <i>TRG1pro:GUS</i> | GUS-L1222                   |
| GUS-L1540           |                    | GCTGCACTCAATGTACACC         |
| GUS-L415            |                    | ACTGAACTGGCAGACTATCC        |
| GUS-L880            |                    | CTTTGGTCGTCATGAAGATGC       |
| GUS-U309            |                    | CTGATGCTCCATCACTTCT         |
| TOPO Vector         | M13 forward primer | GTAACACGACGGCCAG            |
|                     | M13 reverse primer | CAGGAAACAGCTATGAC           |
| pGWB Vector         | attB1              | ACAAGTTTGTACAAAAAAGCAGGCT   |
|                     | attB2              | CACTTTGTACAAGAAAGCTGGGT     |
